# Supplementary material for: Surface-to-volume scaling and aspect ratio preservation in rod-shaped bacteria
Source: eLife journal article supplement (doi:10.7554/elife.47033), 2019-08-28
Supplement: supp [file elife-47033-supp-v1.zip]

**A**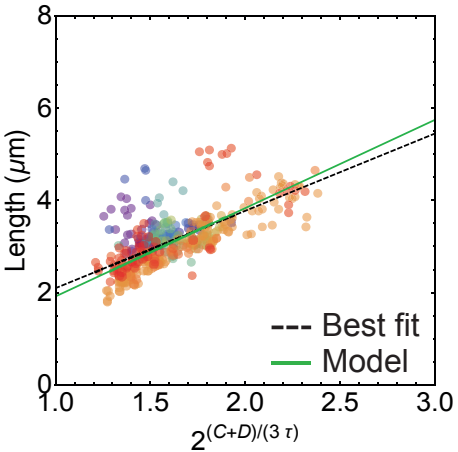**B**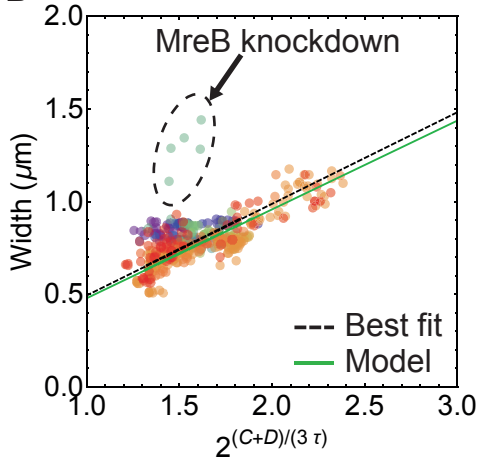*Si et al.*

- DnaA knockdown
- SeqA knockdown
- DiaA knockdown
- oriC block
- Rep knockdown
- SulA overexpression
- MreB knockdown
- FtsZ knockdown
- Fosfomycin
- Triclosan
- Hydroxyurea
- Cephalaxin
- Chloramphenicol
- Erythromycin
- Rifampicin
- Nutrient conditions
