# Supplementary figures and images for: Surface-to-volume scaling and aspect ratio preservation in rod-shaped bacteria
Source: eLife journal article supplement (doi:10.7554/elife.47033), 2019-08-28

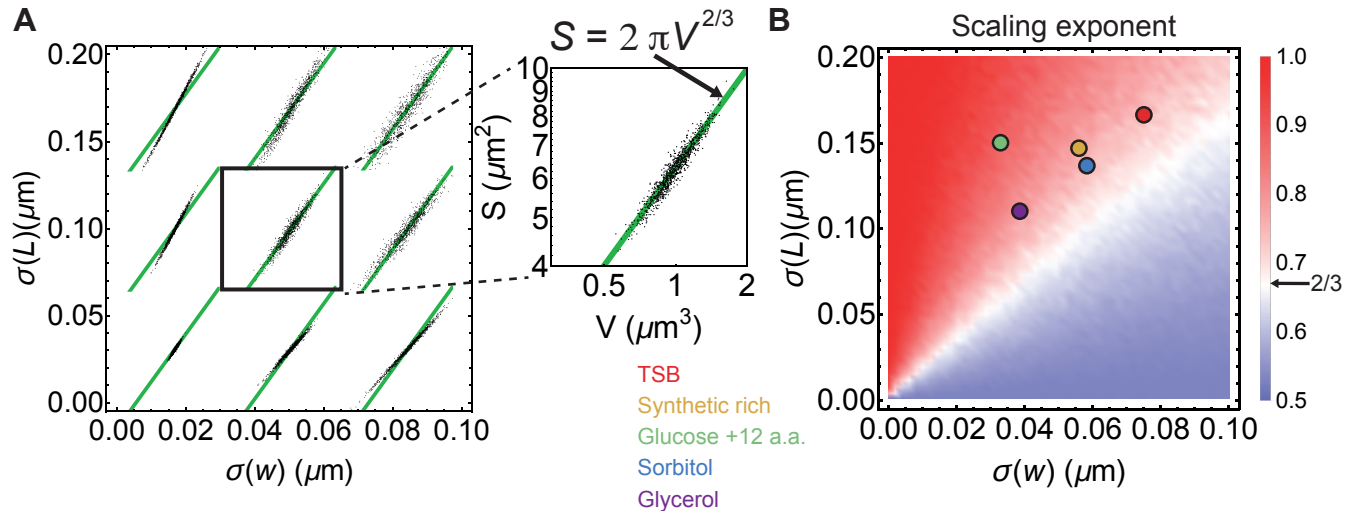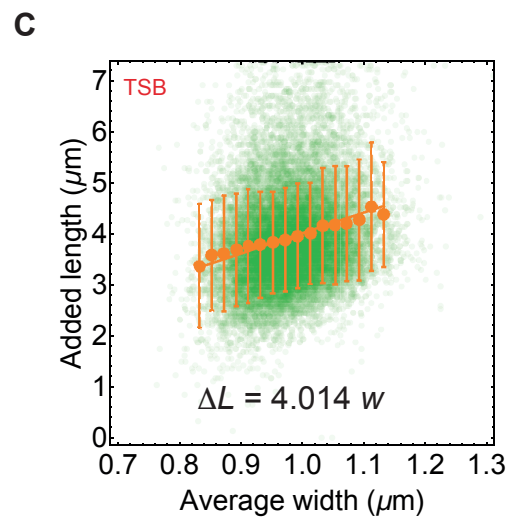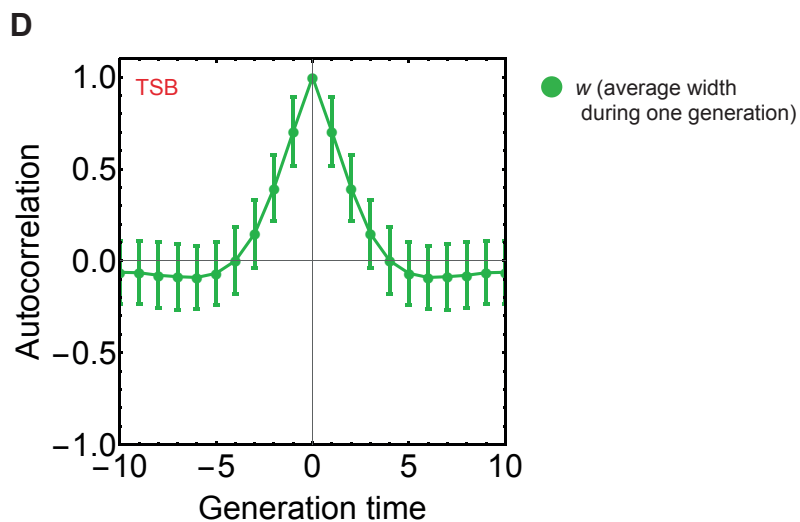

Supplement: supp [file elife-47033-supp-v1.zip]

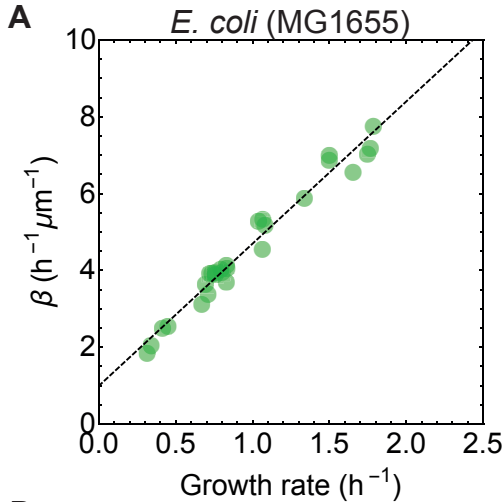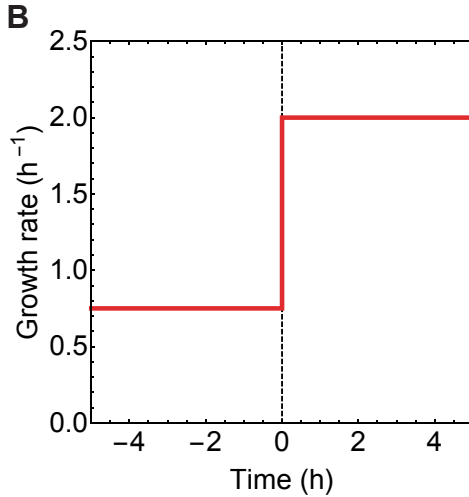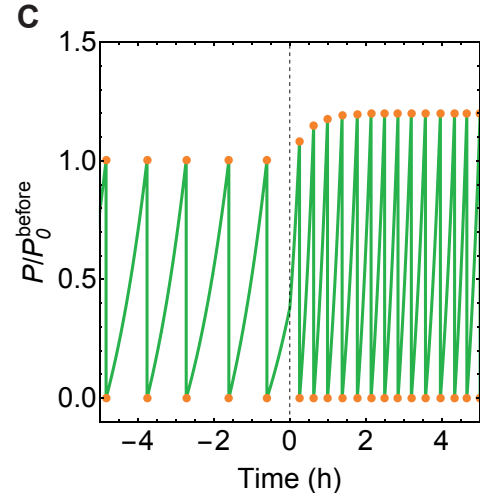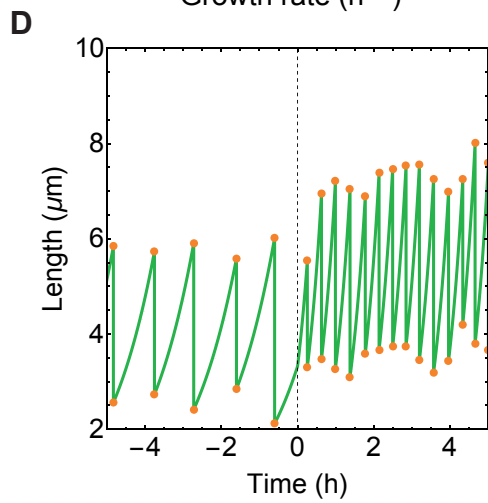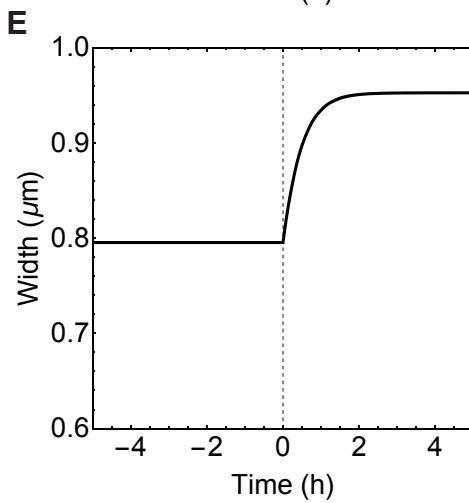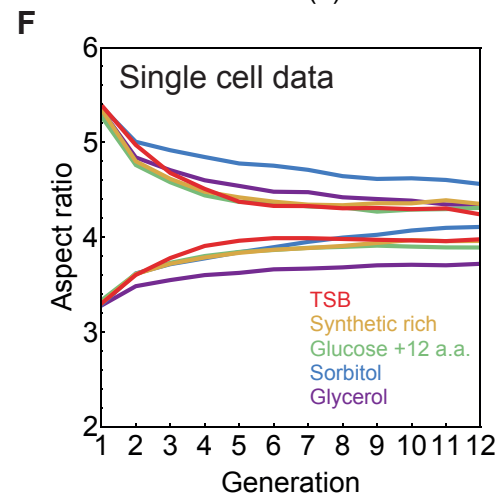

Supplement: supp [file elife-47033-supp-v1.zip]

**A**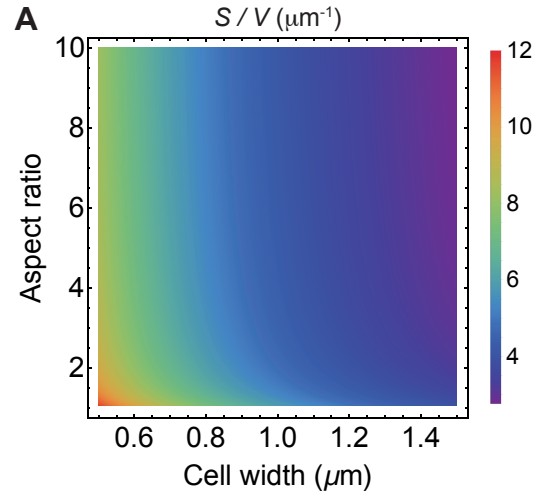**B**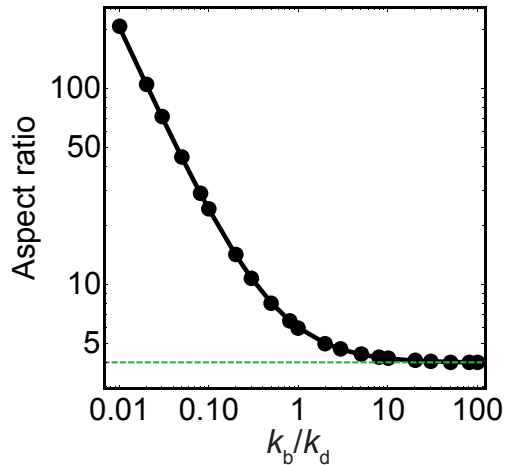**C**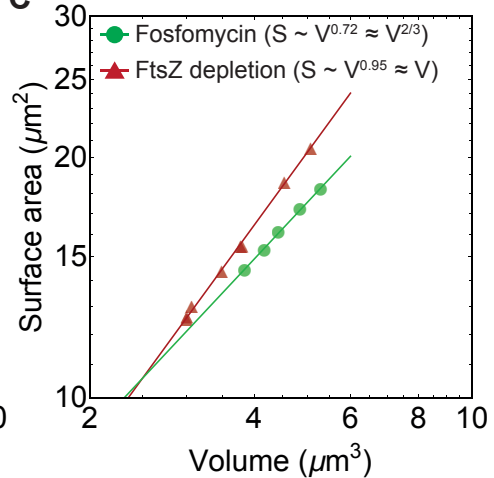

Supplement: supp [file elife-47033-supp-v1.zip]
